# Supplementary material for: Metabolome-Based Genome-Wide Association Study Provides Genetic Insights Into the Natural Variation of Foxtail Millet
Source: PubMed Central journal article supplement (PMC8353534; doi:10.3389/fpls.2021.665530), 2021-07-27
Supplement: Data_Sheet_1.pdf [file Data_Sheet_1.pdf]

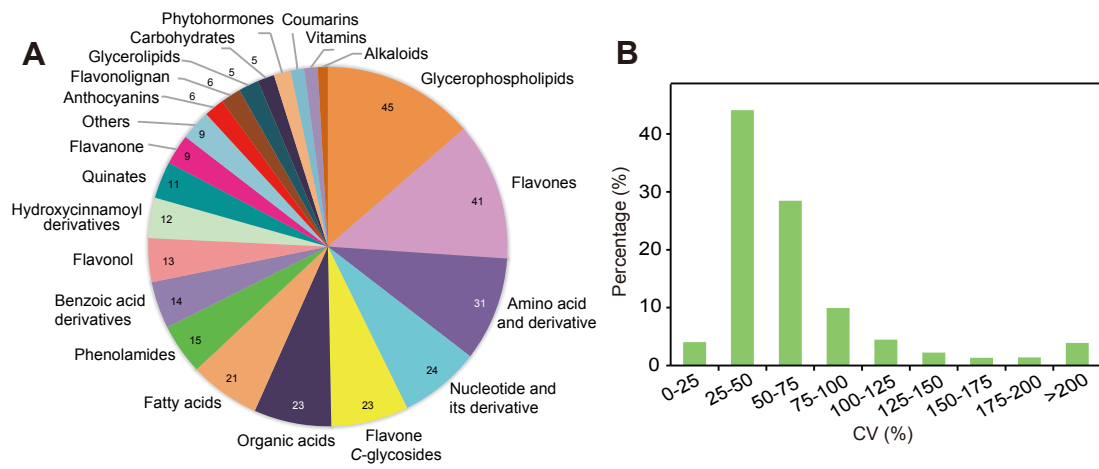

**Figure S1.** Metabolic profiling in the leaf of foxtail millet. **(A)** Classification of 330 identified/annotated metabolites in millet leaf. **(B)** Distribution of the genetic coefficients of variation (CV) of 1335 metabolic traits in the foxtail millet population.

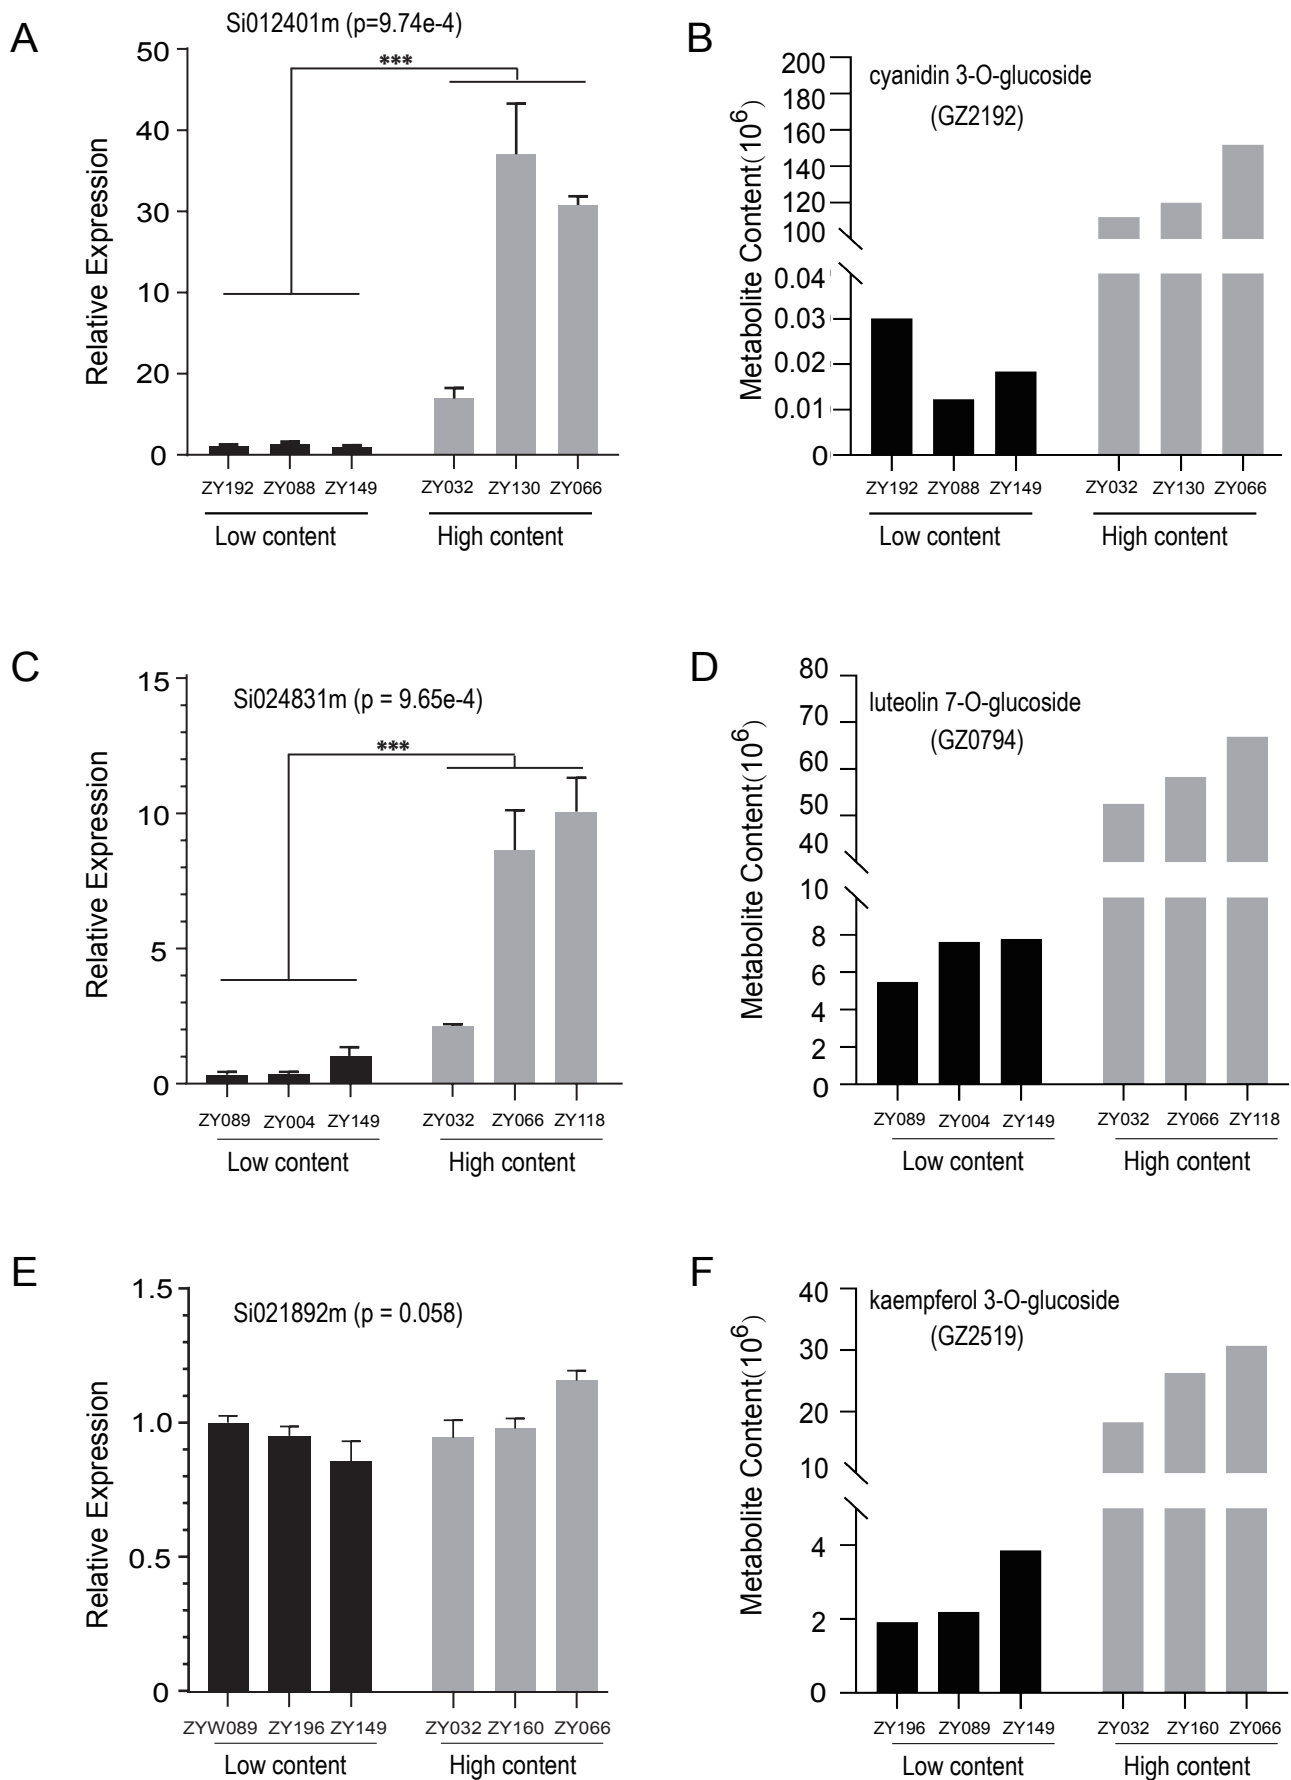

**Figure S2.** Candidate gene expression profiling and the accumulation of regulated metabolites in millet leaves of different genotypes. **(A-B)** The expression level of Si012401m **(A)** and the content of cyanidin 3-O-glucoside (GZ2192) **(B)** in different genotype materials. **(C-D)** The expression level of Si024831m **(C)** and the content of luteolin 7-O-glucoside (GZ0794) **(D)** in different genotype materials. **(E-F)** The expression level of Si021892m **(E)** and the content of kaempferol 3-O-glucoside (GZ2519) **(F)** in different genotype materials. Data represent mean based on three biological replicates, Error bar indicated s.d. based on three biological replicates. (\*\*\*)  $p < 0.001$ , Student's  $t$ -test)
